# Supplementary material for: Associations between Knowledge of the Causes and Perceived Impacts of Climate Change: A Cross-Sectional Survey of Medical, Public Health and Nursing Students in Universities in China
Source: PubMed Central journal article supplement (PMC6313669; doi:10.3390/ijerph15122650), 2018-11-26
Supplement: ijerph-15-02650-s001.pdf [file ijerph-15-02650-s001.pdf]

Supplementary materials

Table S1 Questionnaire items and sources

| Original questions                                                                                                                                                                    |                        | References                                                                                                                                                                                                                                    | Adapted questions in the present study |
|---------------------------------------------------------------------------------------------------------------------------------------------------------------------------------------|------------------------|-----------------------------------------------------------------------------------------------------------------------------------------------------------------------------------------------------------------------------------------------|----------------------------------------|
| Questions                                                                                                                                                                             |                        |                                                                                                                                                                                                                                               |                                        |
| <p><b>In your opinion, extent climate change is:</b><br/>           Controllable<br/>           Uncontrollable<br/>           Neither uncontrollable nor controllable</p>             | (Polivka et al., 2012) | <p><b>Is climate change controllable?</b><br/>           A. Controllable<br/>           B. Uncontrollable<br/>           C. Neither uncontrollable nor controllable</p>                                                                       |                                        |
| <p><b>In general, do you think global warming was a bad or good thing?</b><br/>           A scale from -3 (very bad) to +3 (very good), with no neutral midpoint.</p>                 | (Maibach et al., 2015) | <p><b>Do you think climate change was a good or bad thing?</b><br/>           "very bad"<br/>           "somewhat bad"<br/>           "little bad"<br/>           "little good"<br/>           "somewhat good"<br/>           "very good"</p> |                                        |
| <p><b>Do you think global warming is bad or good for the health of Americans?</b><br/>           A scale from -3 (very bad) to 3 (very good), included "0" as a neutral midpoint.</p> | (Maibach et al., 2015) | <p><b>Do you think climate change is bad or good for human health?</b><br/>           "very bad"<br/>           "somewhat bad"<br/>           "little bad"</p>                                                                                |                                        |
| <p><b>What kind of impacts climate change will bring to us?</b><br/>           None<br/>           Positive effects</p>                                                               | (Wei et al., 2014)     | <p>"little good"<br/>           "somewhat good"<br/>           "very good"</p>                                                                                                                                                                |                                        |

Negative effects

Both of positive effects and negative effects

**Cause knowledge of climate change:**

| Climate change knowledge                                                                                | Correct | Incorrect | Do not know |
|---------------------------------------------------------------------------------------------------------|---------|-----------|-------------|
| 1. The global CO2 concentration in the atmosphere has increased during the past 250 years.              |         |           |             |
| 2. Climate change is mainly caused by human activities.#                                                |         |           |             |
| 3. The last century's global increase in temperature was the largest during the past 1,000 years.       |         |           |             |
| 4. Today's global CO2 concentration in the atmosphere has already occurred in the past 650,000 years. * |         |           |             |

\*Item was reverse coded.

(Shi et al., 2016)

**The causes of climate change:**

| No. | The causes of climate change                                                                         | Correct | Incorrect | Don't know |
|-----|------------------------------------------------------------------------------------------------------|---------|-----------|------------|
| 1   | Climate change is mainly caused by human activities.                                                 |         |           |            |
| 2   | The global CO2 concentration in the atmosphere has increased during the past 250 years.              |         |           |            |
| 3   | The last century's global increase in temperature was the largest during the past 1,000 years.       |         |           |            |
| 4   | Today's global CO2 concentration in the atmosphere has already occurred in the past 650,000 years. * |         |           |            |

\*Item was reverse coded.

**Do you agree that the following issues are the health-related impacts of climate change?**

| Issues                                                           | Yes | No | Don't know |
|------------------------------------------------------------------|-----|----|------------|
| Vector-borne infectious disease                                  |     |    |            |
| Flooding-related displacement                                    |     |    |            |
| Mental health conditions                                         |     |    |            |
| Air quality-related illness                                      |     |    |            |
| Food-borne disease                                               |     |    |            |
| Disruption of health care services during extreme weather events |     |    |            |
| Water-borne infectious disease                                   |     |    |            |
| Heat-related illness                                             |     |    |            |
| Cold-related illness                                             |     |    |            |
| Water-availability illness                                       |     |    |            |
| Malnutrition                                                     |     |    |            |
| Other climate change health-related impacts                      |     |    |            |

(Polivka et al., 2012)

**Perception of public health risks associated with climate change:**

| Items | Very serious | Somewhat serious | Not too serious | Not at all serious |
|-------|--------------|------------------|-----------------|--------------------|
|       |              |                  |                 |                    |

(Bedsworth, 2009)

**Do you agree each following issue as a health impact of climate change?**

| No. | Issues                                                           | Yes | No | Don't know |
|-----|------------------------------------------------------------------|-----|----|------------|
| 1   | Vector-borne infectious disease                                  |     |    |            |
| 2   | Flooding-related displacement                                    |     |    |            |
| 3   | Mental health conditions                                         |     |    |            |
| 4   | Air quality-related illness                                      |     |    |            |
| 5   | Food-borne disease                                               |     |    |            |
| 6   | Disruption of health care services during extreme weather events |     |    |            |
| 7   | Water-borne infectious disease                                   |     |    |            |
| 8   | Heat-related illness                                             |     |    |            |
| 9   | Cold-related illness                                             |     |    |            |
| 10  | Water-availability illness                                       |     |    |            |
| 11  | Malnutrition                                                     |     |    |            |
| 12  | Other climatic change health-related impacts                     |     |    |            |

|                        |  |  |  |  |
|------------------------|--|--|--|--|
| Wildfire               |  |  |  |  |
| Extreme weather        |  |  |  |  |
| Air pollution          |  |  |  |  |
| Heat-related mortality |  |  |  |  |
| Sea-level rise         |  |  |  |  |
| Vector-borne illness   |  |  |  |  |
| Water contamination    |  |  |  |  |
| Water-borne illness    |  |  |  |  |
| Food-borne illness     |  |  |  |  |

**Do you agree that In the next 20 years, the health-related impacts of climate change will be serious in your jurisdiction?**  
 Agree  
 Neutral  
 Disagree

**Do you agree that In the next 20 years, the health-related impacts of climate change will be serious in the United States?**  
 Agree  
 Neutral

(Polivka et al., 2012)

**In the next 20 years, if the health-related impacts of climate change would be serious in your community, in China, and globally?**

|    |                                                                                               |                       |                       |                     |                        |                          |                          |
|----|-----------------------------------------------------------------------------------------------|-----------------------|-----------------------|---------------------|------------------------|--------------------------|--------------------------|
| No | <b>In the next 20 years, the health-related impacts of climate change will be serious in:</b> | <b>strongly agree</b> | <b>somewhat agree</b> | <b>mildly agree</b> | <b>mildly disagree</b> | <b>somewhat disagree</b> | <b>strongly disagree</b> |
|----|-----------------------------------------------------------------------------------------------|-----------------------|-----------------------|---------------------|------------------------|--------------------------|--------------------------|

|                                                                                                                                                                                                  |                    |   |                         |  |  |  |  |  |  |
|--------------------------------------------------------------------------------------------------------------------------------------------------------------------------------------------------|--------------------|---|-------------------------|--|--|--|--|--|--|
| <p>Disagree</p> <p><b>Do you agree that In the next 20 years, the health-related impacts of climate change will be serious around the world?</b></p> <p>Agree</p> <p>Neutral</p> <p>Disagree</p> |                    | 1 | <b>My Community</b>     |  |  |  |  |  |  |
| <p><b>Has climate change happened in your local region?</b></p> <p>Yes</p> <p>No</p> <p>Uncertainty</p>                                                                                          | (Wei et al., 2014) | 2 | <b>China</b>            |  |  |  |  |  |  |
|                                                                                                                                                                                                  |                    | 3 | <b>Around the world</b> |  |  |  |  |  |  |

|                                                                                                                                                                                                                                                                                                                                                                                                          |                               |                                                                                                                                                                                                                                                                                                                                                                                              |
|----------------------------------------------------------------------------------------------------------------------------------------------------------------------------------------------------------------------------------------------------------------------------------------------------------------------------------------------------------------------------------------------------------|-------------------------------|----------------------------------------------------------------------------------------------------------------------------------------------------------------------------------------------------------------------------------------------------------------------------------------------------------------------------------------------------------------------------------------------|
| <p>Using additional variables collected by the Gallup World Poll, we explore the relative influence of individual-level factors in shaping climate change awareness and risk perception among individuals in each nation. These variables include socio-demographics (for example, gender, age, religion, education and location), physical and financial well-being.....</p>                            | <p>(Lee et al., 2015)</p>     | <p><b>Sex:</b><br/>Male<br/>Female<br/><b>Age:</b> _____ years old<br/><b>Grade:</b><br/>third year<br/>fourth year<br/>fifth year<br/><b>Major:</b><br/>Clinical Medicine<br/>Preventive medicine<br/>Nursing<br/><b>How much is the average monthly income of each family member in your family?</b><br/>less than 1000<br/>1000-2000<br/>2000-5000<br/>5000-10000<br/>more than 10000</p> |
| <p>Responses were analyzed descriptively. Chi-square analysis and analysis of variance determined differences among these respondent subgroups: position type (PHNA, PHN), educational preparation (associate's degree, baccalaureate, masters/PhD), age (&lt; 54 years, ≥ 55 years), political perspective (moderate, conservative, liberal), and U.S. region (West, Midwest, South, or Northeast).</p> | <p>(Polivka et al., 2012)</p> | <p><b>Please assess your health status:</b><br/>Very good<br/>Good<br/>Medium<br/>Poor</p>                                                                                                                                                                                                                                                                                                   |

### **References:**

- Bedsworth, L., 2009. Preparing for climate change: a perspective from local public health officers in California. *Environ Health Perspect.* 117, 617-23.
- Lee, T. M., et al., 2015. Predictors of public climate change awareness and risk perception around the world. *Nature climate change.* 5, 1014.
- Maibach, E. W., et al., 2015. Do Americans Understand That Global Warming Is Harmful to Human Health? Evidence From a National Survey. *Ann Glob Health.* 81, 396-409.
- Polivka, B. J., et al., 2012. Public health nurses' knowledge and attitudes regarding climate change. *Environ Health Perspect.* 120, 321-5.
- Shi, J., et al., 2016. Knowledge as a driver of public perceptions about climate change reassessed. 6, 759-762.
- Wei, J., et al., 2014. Perception, attitude and behavior in relation to climate change: A survey among CDC health professionals in Shanxi province, China. *Environmental Research.* 134, 301-308.

**Table S2. Responses to questions about impacts of climate change**

|                                                             | all |      | Clinical medicine |      | Preventive medicine |      | Nursing |      |
|-------------------------------------------------------------|-----|------|-------------------|------|---------------------|------|---------|------|
|                                                             | n   | %    | n                 | %    | n                   | %    | n       | %    |
| <b>Overall, climate change is bad</b>                       |     |      |                   |      |                     |      |         |      |
| very bad                                                    | 241 | 17.4 | 126               | 19.6 | 61                  | 14.3 | 54      | 17.3 |
| somewhat bad                                                | 529 | 38.2 | 236               | 36.7 | 181                 | 42.3 | 112     | 35.8 |
| little bad                                                  | 388 | 28.0 | 184               | 28.6 | 117                 | 27.3 | 87      | 27.8 |
| little good                                                 | 179 | 12.9 | 73                | 11.4 | 55                  | 12.9 | 51      | 16.3 |
| somewhat good                                               | 43  | 3.1  | 23                | 3.6  | 13                  | 3.0  | 7       | 2.2  |
| very good                                                   | 4   | 0.3  | 1                 | 0.2  | 1                   | 0.2  | 2       | 0.6  |
| <b>Climate change is bad for human health</b>               |     |      |                   |      |                     |      |         |      |
| very bad                                                    | 185 | 13.4 | 107               | 16.7 | 36                  | 8.4  | 42      | 13.6 |
| somewhat bad                                                | 597 | 43.3 | 263               | 41.0 | 198                 | 46.2 | 136     | 44.2 |
| little bad                                                  | 440 | 31.9 | 205               | 31.9 | 147                 | 34.3 | 88      | 28.6 |
| little good                                                 | 135 | 9.8  | 57                | 8.9  | 41                  | 9.6  | 37      | 12.0 |
| somewhat good                                               | 20  | 1.5  | 10                | 1.6  | 6                   | 1.4  | 4       | 1.3  |
| very good                                                   | 2   | 0.2  | 0                 | 0.0  | 1                   | 0.2  | 1       | 0.3  |
| <b>Climate change will be serious in my local community</b> |     |      |                   |      |                     |      |         |      |
| strongly agree                                              | 341 | 24.6 | 175               | 27.2 | 76                  | 17.7 | 90      | 28.9 |
| somewhat agree                                              | 484 | 34.9 | 224               | 34.8 | 146                 | 34.0 | 114     | 36.5 |
| little agree                                                | 401 | 28.9 | 177               | 27.5 | 146                 | 34.0 | 78      | 25.0 |
| little disagree                                             | 89  | 6.4  | 38                | 5.9  | 34                  | 7.9  | 17      | 5.5  |
| somewhat disagree                                           | 52  | 3.8  | 22                | 3.4  | 21                  | 4.9  | 9       | 2.9  |
| strongly disagree                                           | 19  | 1.4  | 8                 | 1.2  | 7                   | 1.6  | 4       | 1.3  |
| <b>Climate change will be serious in China</b>              |     |      |                   |      |                     |      |         |      |
| strongly agree                                              | 497 | 35.9 | 247               | 38.4 | 133                 | 30.9 | 117     | 37.5 |
| somewhat agree                                              | 560 | 40.4 | 246               | 38.2 | 183                 | 42.6 | 131     | 42.0 |
| little agree                                                | 273 | 19.7 | 126               | 19.6 | 97                  | 22.6 | 50      | 16.0 |
| little disagree                                             | 43  | 3.1  | 19                | 3.0  | 13                  | 3.0  | 11      | 3.5  |
| somewhat disagree                                           | 8   | 0.6  | 3                 | 0.5  | 3                   | 0.7  | 2       | 0.6  |
| strongly disagree                                           | 5   | 0.4  | 3                 | 0.5  | 1                   | 0.2  | 1       | 0.3  |
| <b>Climate change will be serious in the world</b>          |     |      |                   |      |                     |      |         |      |
| strongly agree                                              | 542 | 39.1 | 257               | 39.9 | 150                 | 34.9 | 135     | 43.3 |
| somewhat agree                                              | 520 | 37.5 | 242               | 37.6 | 176                 | 40.9 | 102     | 32.7 |
| little agree                                                | 256 | 18.5 | 110               | 17.1 | 84                  | 19.5 | 62      | 19.9 |
| little disagree                                             | 51  | 3.7  | 28                | 4.4  | 14                  | 3.3  | 9       | 2.9  |
| somewhat disagree                                           | 11  | 0.8  | 4                 | 0.6  | 4                   | 0.9  | 3       | 1.0  |
| strongly disagree                                           | 6   | 0.4  | 3                 | 0.5  | 2                   | 0.5  | 1       | 0.3  |



**Table S3-S30 Details of multivariate logistic regression models**

**Independent variable: Pcontrol -- Climate change Controllable or not**

Table S3. Multivariate logistic regression analysis on perceptions regarding whether climate change is controllable or not for all medical students

| <b>Pcontrol</b>                       | <b>Odds Ratio</b> | <b>Std. Err.</b> | <b>z</b> | <b>P&gt;z</b> | <b>[95% Conf. Interval]</b> |
|---------------------------------------|-------------------|------------------|----------|---------------|-----------------------------|
| <b>Cause knowledge</b>                | 1.69              | 0.21             | 4.27     | 0.00          | 1.33 2.15                   |
| <b>Gender</b>                         | 0.80              | 0.11             | -1.62    | 0.11          | 0.61 1.05                   |
| <b>Age (ref: ≤20)</b>                 |                   |                  |          |               |                             |
| 21-22                                 | 1.18              | 0.25             | 0.77     | 0.44          | 0.78 1.79                   |
| >22                                   | 1.33              | 0.35             | 1.11     | 0.27          | 0.80 2.21                   |
| <b>Area (ref: east)</b>               |                   |                  |          |               |                             |
| North                                 | 0.74              | 0.15             | -1.46    | 0.15          | 0.50 1.11                   |
| Central                               | 0.66              | 0.14             | -1.90    | 0.06          | 0.43 1.01                   |
| West                                  | 0.50              | 0.11             | -3.26    | 0.00          | 0.33 0.76                   |
| South                                 | 0.62              | 0.13             | -2.22    | 0.03          | 0.41 0.95                   |
| <b>Major (ref: clinical medicine)</b> |                   |                  |          |               |                             |
| Preventive medicine                   | 1.66              | 0.25             | 3.37     | 0.00          | 1.24 2.23                   |
| Nursing                               | 0.95              | 0.16             | -0.33    | 0.74          | 0.68 1.31                   |
| <b>Income(ref: &lt; 1000)</b>         |                   |                  |          |               |                             |
| 1000-1999                             | 1.39              | 0.31             | 1.47     | 0.14          | 0.90 2.16                   |
| 2000-4999                             | 1.44              | 0.30             | 1.77     | 0.08          | 0.96 2.17                   |
| 5000-9999                             | 1.02              | 0.23             | 0.09     | 0.93          | 0.66 1.57                   |
| ≥10000                                | 1.06              | 0.28             | 0.23     | 0.82          | 0.63 1.78                   |
| <b>Health (ref: very good)</b>        |                   |                  |          |               |                             |
| Good                                  | 0.85              | 0.13             | -1.05    | 0.29          | 0.63 1.15                   |
| Medium or poor                        | 0.80              | 0.16             | -1.13    | 0.26          | 0.54 1.18                   |
| <b>_Cons</b>                          | 1.77              | 0.65             | 1.57     | 0.12          | 0.87 3.63                   |

Logistic regression

Number of observations = 1311

LR chi2(16) = 61.59

Prob > chi2 = 0.0000

Pseudo R2 = 0.0373

Log likelihood = -795.10691

Table S4. Multivariate logistic regression analysis on perceptions regarding whether climate change is controllable or not for clinical medicine students

| <b>Pcontrol</b>                | <b>Odds ratio</b> | <b>Std. Err.</b> | <b>Z</b> | <b>P&gt;z</b> | <b>[95% conf.</b> | <b>Interval]</b> |
|--------------------------------|-------------------|------------------|----------|---------------|-------------------|------------------|
| <b>Cause knowledge</b>         | 1.86              | 0.33             | 3.46     | 0.00          | 1.31              | 2.63             |
| <b>Gender</b>                  | 1.03              | 0.19             | 0.14     | 0.89          | 0.72              | 1.46             |
| <b>Age(ref:≤20)</b>            |                   |                  |          |               |                   |                  |
| 21-22                          | 1.13              | 0.41             | 0.33     | 0.75          | 0.55              | 2.30             |
| >22                            | 1.17              | 0.48             | 0.39     | 0.70          | 0.53              | 2.60             |
| <b>Area (ref: east)</b>        |                   |                  |          |               |                   |                  |
| North                          | 0.44              | 0.14             | -2.56    | 0.01          | 0.24              | 0.83             |
| Central                        | 0.33              | 0.11             | -3.26    | 0.00          | 0.17              | 0.64             |
| West                           | 0.25              | 0.08             | -4.26    | 0.00          | 0.13              | 0.47             |
| South                          | 0.29              | 0.10             | -3.71    | 0.00          | 0.15              | 0.56             |
| <b>Income(ref: &lt; 1000)</b>  |                   |                  |          |               |                   |                  |
| 1000-1999                      | 1.23              | 0.42             | 0.61     | 0.54          | 0.63              | 2.41             |
| 2000-4999                      | 1.90              | 0.60             | 2.06     | 0.04          | 1.03              | 3.52             |
| 5000-9999                      | 1.15              | 0.38             | 0.43     | 0.66          | 0.60              | 2.21             |
| ≥10000                         | 1.02              | 0.38             | 0.04     | 0.97          | 0.49              | 2.10             |
| <b>Health (ref: very good)</b> |                   |                  |          |               |                   |                  |
| Good                           | 0.86              | 0.19             | -0.68    | 0.49          | 0.56              | 1.32             |
| Medium or poor                 | 0.63              | 0.18             | -1.63    | 0.10          | 0.37              | 1.10             |
| <b>_Cons</b>                   | 2.66              | 1.45             | 1.79     | 0.07          | 0.91              | 7.75             |

Logistic regression

Number of observations = 619

LR chi2(14) = 50.04

Prob > chi2 = 0.0000

Pseudo R2 = 0.0622

Log likelihood = -377.18229

Table S5. Multivariate logistic regression analysis on perceptions regarding whether climate change is controllable or not for preventive medicine students

| <b>Pcontrol</b>                | <b>Odds Ratio</b> | <b>Std. Err.</b> | <b>z</b> | <b>P&gt;z</b> | <b>[95% Conf. Interval]</b> |
|--------------------------------|-------------------|------------------|----------|---------------|-----------------------------|
| <b>Cause knowledge</b>         | 1.35              | 0.33             | 1.23     | 0.22          | 0.84 2.19                   |
| <b>Gender</b>                  | 0.60              | 0.16             | -1.91    | 0.06          | 0.36 1.01                   |
| <b>Age (ref: ≤20)</b>          |                   |                  |          |               |                             |
| 21-22                          | 2.16              | 1.09             | 1.52     | 0.13          | 0.80 5.82                   |
| >22                            | 2.07              | 1.19             | 1.26     | 0.21          | 0.67 6.37                   |
| <b>Area (ref: East)</b>        |                   |                  |          |               |                             |
| North                          | 1.31              | 0.55             | 0.65     | 0.52          | 0.58 2.97                   |
| Central                        | 0.85              | 0.35             | -0.40    | 0.69          | 0.38 1.88                   |
| West                           | 0.91              | 0.38             | -0.24    | 0.81          | 0.40 2.07                   |
| South                          | 0.99              | 0.39             | -0.02    | 0.98          | 0.46 2.13                   |
| <b>Income(ref: &lt; 1000)</b>  |                   |                  |          |               |                             |
| 1000-1999                      | 1.88              | 0.81             | 1.46     | 0.14          | 0.81 4.35                   |
| 2000-4999                      | 1.69              | 0.67             | 1.34     | 0.18          | 0.78 3.67                   |
| 5000-9999                      | 1.16              | 0.48             | 0.36     | 0.72          | 0.52 2.62                   |
| ≥10000                         | 1.08              | 0.56             | 0.15     | 0.88          | 0.39 2.98                   |
| <b>Health (ref: very good)</b> |                   |                  |          |               |                             |
| Good                           | 0.92              | 0.29             | -0.27    | 0.79          | 0.49 1.71                   |
| Medium or poor                 | 0.75              | 0.30             | -0.73    | 0.46          | 0.34 1.63                   |
| <b>_Cons</b>                   | 1.17              | 0.85             | 0.22     | 0.82          | 0.29 4.83                   |

Logistic regression

Number of observations = 398

LR chi2(14) = 14.04

Prob > chi2 = 0.4466

Pseudo R2 = 0.0316

Log likelihood = -215.1254

Table S6. Multivariate logistic regression analysis on perceptions regarding whether climate change is controllable or not for nursing students

| <b>Pcontrol</b>                | <b>Odds Ratio</b> | <b>Std. Err.</b> | <b>z</b> | <b>P&gt;z</b> | <b>[95% Conf.</b> | <b>Interval]</b> |
|--------------------------------|-------------------|------------------|----------|---------------|-------------------|------------------|
| Cause knowledge                | 1.82              | 0.49             | 2.25     | 0.02          | 1.08              | 3.07             |
| Gender                         | 0.76              | 0.31             | -0.67    | 0.51          | 0.34              | 1.70             |
| <b>Age (ref: ≤20)</b>          |                   |                  |          |               |                   |                  |
| 21-22                          | 0.88              | 0.31             | -0.37    | 0.71          | 0.44              | 1.77             |
| >22                            | 1.01              | 0.53             | 0.01     | 0.99          | 0.36              | 2.84             |
| <b>Area (ref: East)</b>        |                   |                  |          |               |                   |                  |
| North                          | 0.75              | 0.30             | -0.73    | 0.47          | 0.34              | 1.63             |
| Central                        | 1.37              | 0.60             | 0.71     | 0.48          | 0.58              | 3.23             |
| West                           | 0.58              | 0.25             | -1.28    | 0.20          | 0.25              | 1.33             |
| South                          | 0.75              | 0.36             | -0.60    | 0.55          | 0.29              | 1.92             |
| <b>Income (ref: &lt; 1000)</b> |                   |                  |          |               |                   |                  |
| 1000-1999                      | 1.02              | 0.46             | 0.05     | 0.96          | 0.42              | 2.48             |
| 2000-4999                      | 0.63              | 0.27             | -1.08    | 0.28          | 0.27              | 1.46             |
| 5000-9999                      | 0.54              | 0.26             | -1.27    | 0.20          | 0.21              | 1.39             |
| ≥10000                         | 1.02              | 0.72             | 0.03     | 0.97          | 0.26              | 4.09             |
| <b>Health (ref: very good)</b> |                   |                  |          |               |                   |                  |
| Good                           | 0.90              | 0.29             | -0.33    | 0.74          | 0.48              | 1.69             |
| Medium or poor                 | 1.65              | 0.78             | 1.06     | 0.29          | 0.65              | 4.15             |
| <b>_Cons</b>                   | 2.52              | 1.74             | 1.34     | 0.18          | 0.65              | 9.73             |

Logistic regression

Number of observations = 294

LR chi2(14) = 17.84

Prob > chi2 = 0.2142

Pseudo R2 = 0.0461

Log likelihood = -184.39411

**Independent variable: Pclimate--Climate change bad or not**

Table S7. Multivariate logistic regression analysis on perceptions regarding whether climate change is bad or not for all medical students

| <b>Pclimate</b>                       | <b>Odds Ratio</b> | <b>Std. Err.</b> | <b>z</b> | <b>P&gt;z</b> | <b>[95% Conf. Interval]</b> |
|---------------------------------------|-------------------|------------------|----------|---------------|-----------------------------|
| <b>Cause knowledge</b>                | 2.16              | 0.35             | 4.81     | 0.00          | 1.58 2.96                   |
| <b>Gender</b>                         | 0.53              | 0.09             | -3.62    | 0.00          | 0.38 0.75                   |
| <b>Age(ref: ≤20)</b>                  |                   |                  |          |               |                             |
| 21-22                                 | 1.66              | 0.43             | 1.97     | 0.05          | 1.00 2.76                   |
| >22                                   | 1.52              | 0.48             | 1.35     | 0.18          | 0.83 2.81                   |
| <b>Area (ref: east)</b>               |                   |                  |          |               |                             |
| North                                 | 1.08              | 0.25             | 0.32     | 0.75          | 0.68 1.71                   |
| Central                               | 1.21              | 0.31             | 0.73     | 0.46          | 0.73 1.99                   |
| West                                  | 1.58              | 0.41             | 1.74     | 0.08          | 0.94 2.63                   |
| South                                 | 1.75              | 0.46             | 2.13     | 0.03          | 1.05 2.93                   |
| <b>Major (ref: clinical medicine)</b> |                   |                  |          |               |                             |
| Preventive medicine                   | 0.76              | 0.14             | -1.48    | 0.14          | 0.52 1.10                   |
| Nursing                               | 0.66              | 0.14             | -1.98    | 0.05          | 0.43 1.00                   |
| <b>Income (ref: &lt; 1000)</b>        |                   |                  |          |               |                             |
| 1000-1999                             | 1.86              | 0.51             | 2.27     | 0.02          | 1.09 3.18                   |
| 2000-4999                             | 1.53              | 0.37             | 1.75     | 0.08          | 0.95 2.48                   |
| 5000-9999                             | 1.81              | 0.49             | 2.18     | 0.03          | 1.06 3.09                   |
| ≥10000                                | 1.45              | 0.47             | 1.16     | 0.25          | 0.77 2.73                   |
| <b>Health (ref: very good)</b>        |                   |                  |          |               |                             |
| Good                                  | 1.43              | 0.26             | 1.97     | 0.05          | 1.00 2.05                   |
| Medium or poor                        | 1.65              | 0.42             | 1.97     | 0.05          | 1.00 2.73                   |
| <b>_Cons</b>                          | 1.36              | 0.59             | 0.72     | 0.47          | 0.59 3.17                   |

Logistic regression

Number of observations = 1311

LR chi2(16) = 59.98

Prob > chi2 = 0.0000

Pseudo R2 = 0.0517

Log likelihood = -550.11556

Table S8. Multivariate logistic regression analysis on perceptions regarding whether climate change is bad or not for Clinical medicine students

| <b>Pclimate</b>                | <b>Odds Ratio</b> | <b>Std. Err.</b> | <b>z</b> | <b>P&gt;z</b> | <b>[95% Conf. Interval]</b> |      |
|--------------------------------|-------------------|------------------|----------|---------------|-----------------------------|------|
| <b>Cause knowledge</b>         | 2.00              | 0.48             | 2.90     | 0.00          | 1.25                        | 3.19 |
| <b>Gender</b>                  | 0.55              | 0.13             | -2.49    | 0.01          | 0.34                        | 0.88 |
| <b>Age (ref: ≤20)</b>          |                   |                  |          |               |                             |      |
| 21-22                          | 1.27              | 0.62             | 0.48     | 0.63          | 0.49                        | 3.30 |
| >22                            | 0.84              | 0.44             | -0.33    | 0.74          | 0.30                        | 2.37 |
| <b>Area (ref: east)</b>        |                   |                  |          |               |                             |      |
| North                          | 0.92              | 0.32             | -0.23    | 0.82          | 0.47                        | 1.81 |
| Central                        | 1.20              | 0.50             | 0.44     | 0.66          | 0.53                        | 2.70 |
| West                           | 1.30              | 0.51             | 0.67     | 0.51          | 0.60                        | 2.82 |
| South                          | 1.30              | 0.52             | 0.67     | 0.51          | 0.60                        | 2.84 |
| <b>Income (ref: &lt; 1000)</b> |                   |                  |          |               |                             |      |
| 1000-1999                      | 1.48              | 0.64             | 0.92     | 0.36          | 0.64                        | 3.44 |
| 2000-4999                      | 1.51              | 0.57             | 1.08     | 0.28          | 0.72                        | 3.18 |
| 5000-9999                      | 1.89              | 0.81             | 1.48     | 0.14          | 0.81                        | 4.37 |
| ≥10000                         | 1.28              | 0.58             | 0.53     | 0.59          | 0.52                        | 3.13 |
| <b>Health (ref: very good)</b> |                   |                  |          |               |                             |      |
| Good                           | 1.35              | 0.36             | 1.12     | 0.26          | 0.80                        | 2.29 |
| Medium or poor                 | 1.56              | 0.59             | 1.17     | 0.24          | 0.74                        | 3.26 |
| <b>_Cons</b>                   | 2.50              | 1.68             | 1.36     | 0.18          | 0.66                        | 9.36 |

Logistic regression

Number of observations = 619

LR chi2(14) = 26.09

Prob > chi2 = 0.0252

Pseudo R2 = 0.0501

Log likelihood = -247.13464

Table S9. Multivariate logistic regression analysis on perceptions regarding whether climate change is bad or not for Preventive medicine students

| <b>Pclimate</b>                | <b>Odds Ratio</b> | <b>Std. Err.</b> | <b>z</b> | <b>P&gt;z</b> | <b>[95% Conf. Interval]</b> |       |
|--------------------------------|-------------------|------------------|----------|---------------|-----------------------------|-------|
| <b>Cause knowledge</b>         | 2.31              | 0.70             | 2.78     | 0.01          | 1.28                        | 4.17  |
| <b>Gender</b>                  | 0.63              | 0.19             | -1.51    | 0.13          | 0.34                        | 1.15  |
| <b>Age (ref: ≤20)</b>          |                   |                  |          |               |                             |       |
| 21-22                          | 1.76              | 1.05             | 0.95     | 0.34          | 0.55                        | 5.64  |
| >22                            | 2.32              | 1.56             | 1.24     | 0.21          | 0.62                        | 8.70  |
| <b>Area (ref: East)</b>        |                   |                  |          |               |                             |       |
| North                          | 1.31              | 0.57             | 0.61     | 0.54          | 0.55                        | 3.10  |
| Central                        | 1.10              | 0.48             | 0.21     | 0.83          | 0.46                        | 2.59  |
| West                           | 3.27              | 1.70             | 2.28     | 0.02          | 1.18                        | 9.05  |
| South                          | 4.62              | 2.40             | 2.94     | 0.00          | 1.67                        | 12.80 |
| <b>Income (ref: &lt; 1000)</b> |                   |                  |          |               |                             |       |
| 1000-1999                      | 2.10              | 1.09             | 1.43     | 0.15          | 0.76                        | 5.80  |
| 2000-4999                      | 1.27              | 0.59             | 0.50     | 0.61          | 0.51                        | 3.16  |
| 5000-9999                      | 1.66              | 0.86             | 0.98     | 0.33          | 0.60                        | 4.58  |
| ≥10000                         | 1.08              | 0.66             | 0.13     | 0.90          | 0.33                        | 3.58  |
| <b>Health (ref: very good)</b> |                   |                  |          |               |                             |       |
| Good                           | 1.18              | 0.44             | 0.45     | 0.66          | 0.57                        | 2.43  |
| Medium or poor                 | 1.33              | 0.64             | 0.60     | 0.55          | 0.52                        | 3.41  |
| <b>_Cons</b>                   | 0.80              | 0.66             | -0.27    | 0.78          | 0.16                        | 4.00  |

Logistic regression

Number of observations = 398

LR chi2(14) = 30.10

Prob > chi2 = 0.0074

Pseudo R2 = 0.0858

Log likelihood = -160.4666

Table S10. Multivariate logistic regression analysis on perceptions regarding whether climate change is bad or not for Nursing students

| <b>Pclimate</b>                | <b>Odds Ratio</b> | <b>Std. Err.</b> | <b>z</b> | <b>P&gt;z</b> | <b>[95% Conf. Interval]</b> |
|--------------------------------|-------------------|------------------|----------|---------------|-----------------------------|
| <b>Cause knowledge</b>         | 2.83              | 1.02             | 2.88     | 0.00          | 1.39 5.74                   |
| <b>Gender</b>                  | 0.52              | 0.25             | -1.36    | 0.17          | 0.20 1.33                   |
| <b>Age (ref: ≤20)</b>          |                   |                  |          |               |                             |
| 21-22                          | 1.22              | 0.52             | 0.47     | 0.64          | 0.53 2.80                   |
| >22                            | 2.17              | 1.54             | 1.09     | 0.28          | 0.54 8.74                   |
| <b>Area (ref: east)</b>        |                   |                  |          |               |                             |
| North                          | 1.07              | 0.54             | 0.13     | 0.90          | 0.40 2.87                   |
| Central                        | 1.53              | 0.86             | 0.75     | 0.46          | 0.50 4.63                   |
| West                           | 1.08              | 0.57             | 0.14     | 0.89          | 0.38 3.05                   |
| South                          | 0.89              | 0.52             | -0.19    | 0.85          | 0.28 2.80                   |
| <b>Income (ref: &lt; 1000)</b> |                   |                  |          |               |                             |
| 1000-1999                      | 2.34              | 1.25             | 1.59     | 0.11          | 0.82 6.65                   |
| 2000-4999                      | 1.57              | 0.77             | 0.92     | 0.36          | 0.60 4.11                   |
| 5000-9999                      | 1.37              | 0.75             | 0.56     | 0.57          | 0.46 4.04                   |
| ≥10000                         | 4.90              | 5.51             | 1.41     | 0.16          | 0.54 44.47                  |
| <b>Health (ref: very good)</b> |                   |                  |          |               |                             |
| Good                           | 2.05              | 0.75             | 1.97     | 0.05          | 1.01 4.18                   |
| Medium or poor                 | 2.68              | 1.57             | 1.69     | 0.09          | 0.85 8.42                   |
| <b>_Cons</b>                   | 0.86              | 0.69             | -0.19    | 0.85          | 0.18 4.18                   |

Logistic regression

Number of observations = 294

LR chi2(14) = 23.44

Prob > chi2 = 0.0534

Pseudo R2 = 0.0819

Log likelihood = -131.4302



**Independent variable: Pclihealth--Climate change health impacts bad or not**

Table S11. Multivariate logistic regression analysis on perceptions regarding whether climate change health impact is bad or not for all medical students

| <b>Pclihealth</b>                     | <b>Odds Ratio</b> | <b>Std. Err.</b> | <b>z</b> | <b>P&gt;z</b> | <b>[95% Conf. Interval]</b> |
|---------------------------------------|-------------------|------------------|----------|---------------|-----------------------------|
| <b>Cause knowledge</b>                | 1.84              | 0.33             | 3.37     | 0.00          | 1.29 2.61                   |
| <b>Gender</b>                         | 0.53              | 0.10             | -3.25    | 0.00          | 0.36 0.78                   |
| <b>Age (ref: ≤20)</b>                 |                   |                  |          |               |                             |
| 21-22                                 | 1.60              | 0.46             | 1.62     | 0.11          | 0.91 2.82                   |
| >22                                   | 1.74              | 0.62             | 1.55     | 0.12          | 0.86 3.50                   |
| <b>Area (ref: east)</b>               |                   |                  |          |               |                             |
| North                                 | 1.15              | 0.30             | 0.54     | 0.59          | 0.69 1.93                   |
| Central                               | 1.83              | 0.56             | 1.96     | 0.05          | 1.00 3.35                   |
| West                                  | 1.36              | 0.39             | 1.07     | 0.29          | 0.78 2.37                   |
| South                                 | 1.53              | 0.44             | 1.47     | 0.14          | 0.87 2.68                   |
| <b>Major (ref: clinical medicine)</b> |                   |                  |          |               |                             |
| Preventive medicine                   | 0.80              | 0.17             | -1.02    | 0.31          | 0.53 1.22                   |
| Nursing                               | 0.64              | 0.15             | -1.88    | 0.06          | 0.40 1.02                   |
| <b>Income (ref: &lt; 1000)</b>        |                   |                  |          |               |                             |
| 1000-1999                             | 1.17              | 0.35             | 0.52     | 0.61          | 0.65 2.11                   |
| 2000-4999                             | 1.48              | 0.42             | 1.39     | 0.16          | 0.85 2.59                   |
| 5000-9999                             | 1.34              | 0.41             | 0.95     | 0.34          | 0.73 2.45                   |
| ≥10000                                | 1.36              | 0.51             | 0.83     | 0.41          | 0.65 2.85                   |
| <b>Health (ref: very good)</b>        |                   |                  |          |               |                             |
| Good                                  | 1.19              | 0.25             | 0.86     | 0.39          | 0.80 1.79                   |
| Medium or poor                        | 1.51              | 0.45             | 1.39     | 0.16          | 0.85 2.69                   |
| <b>_Cons</b>                          | 2.75              | 1.34             | 2.07     | 0.04          | 1.06 7.15                   |

Logistic regression

Number of observations = 1311  
 LR chi2(16)= 34.69  
 Prob > chi2 = 0.0044  
 Pseudo R2 = 0.0366

Log likelihood = -457.03837

Table S12. Multivariate logistic regression analysis on perceptions regarding whether climate change health impact is bad or not for clinical medicine students

| <b>Pclihealth</b>              | <b>Odds Ratio</b> | <b>Std. Err.</b> | <b>z</b> | <b>P&gt;z</b> | <b>[95% Conf. Interval]</b> |
|--------------------------------|-------------------|------------------|----------|---------------|-----------------------------|
| <b>Cause knowledge</b>         | 2.19              | 0.60             | 2.85     | 0.00          | 1.28 3.77                   |
| <b>Gender</b>                  | 0.52              | 0.15             | -2.30    | 0.02          | 0.30 0.91                   |
| <b>Age (ref: ≤20)</b>          |                   |                  |          |               |                             |
| 21-22                          | 1.47              | 0.78             | 0.73     | 0.46          | 0.52 4.16                   |
| >22                            | 1.17              | 0.69             | 0.27     | 0.79          | 0.37 3.70                   |
| <b>Area (ref: east)</b>        |                   |                  |          |               |                             |
| North                          | 1.03              | 0.43             | 0.07     | 0.94          | 0.45 2.35                   |
| Central                        | 1.43              | 0.73             | 0.70     | 0.48          | 0.53 3.89                   |
| West                           | 0.77              | 0.33             | -0.61    | 0.54          | 0.33 1.80                   |
| South                          | 0.95              | 0.42             | -0.13    | 0.90          | 0.39 2.28                   |
| <b>Income (ref: &lt; 1000)</b> |                   |                  |          |               |                             |
| 1000-1999                      | 0.98              | 0.48             | -0.04    | 0.96          | 0.37 2.58                   |
| 2000-4999                      | 1.25              | 0.57             | 0.49     | 0.62          | 0.51 3.06                   |
| 5000-9999                      | 1.07              | 0.52             | 0.13     | 0.89          | 0.41 2.80                   |
| ≥10000                         | 0.97              | 0.52             | -0.06    | 0.95          | 0.34 2.78                   |
| <b>Health (ref: very good)</b> |                   |                  |          |               |                             |
| Good                           | 1.19              | 0.37             | 0.55     | 0.58          | 0.65 2.18                   |
| Medium or poor                 | 1.31              | 0.56             | 0.63     | 0.53          | 0.57 3.02                   |
| <b>_Cons</b>                   | 4.99              | 3.82             | 2.10     | 0.04          | 1.11 22.37                  |

Logistic regression

Number of observations = 619

LR chi2(14) = 17.87

Prob > chi2 = 0.2127

Log likelihood = -201.15144

Pseudo R2 = 0.0425





**Independent variable: Local0--Future threats in local**

Table S15. Multivariate logistic regression analysis on health threats of climate change health impact is serious or not in future in local community for all medical students

| <b>Local0</b>                         | <b>Odds Ratio</b> | <b>Std. Err.</b> | <b>z</b> | <b>P&gt;z</b> | <b>[95% Conf. Interval]</b> |
|---------------------------------------|-------------------|------------------|----------|---------------|-----------------------------|
| <b>Cause knowledge</b>                | 2.07              | 0.39             | 3.90     | 0.00          | 1.44 2.98                   |
| <b>Gender</b>                         | 0.68              | 0.14             | -1.90    | 0.06          | 0.46 1.01                   |
| <b>Age (ref: ≤20)</b>                 |                   |                  |          |               |                             |
| 21-22                                 | 2.17              | 0.61             | 2.76     | 0.01          | 1.25 3.75                   |
| >22                                   | 2.26              | 0.80             | 2.30     | 0.02          | 1.13 4.53                   |
| <b>Area (ref: East)</b>               |                   |                  |          |               |                             |
| North                                 | 1.61              | 0.50             | 1.52     | 0.13          | 0.87 2.96                   |
| Central                               | 1.35              | 0.43             | 0.96     | 0.34          | 0.73 2.51                   |
| West                                  | 0.78              | 0.22             | -0.86    | 0.39          | 0.44 1.37                   |
| South                                 | 1.05              | 0.31             | 0.16     | 0.87          | 0.59 1.86                   |
| <b>Major (ref: Clinical medicine)</b> |                   |                  |          |               |                             |
| Preventive medicine                   | 0.73              | 0.15             | -1.53    | 0.13          | 0.48 1.09                   |
| Nursing                               | 1.18              | 0.31             | 0.63     | 0.53          | 0.70 1.98                   |
| <b>Income (ref: &lt;1000)</b>         |                   |                  |          |               |                             |
| 1000-1999                             | 0.81              | 0.26             | -0.65    | 0.52          | 0.43 1.53                   |
| 2000-4999                             | 1.02              | 0.32             | 0.06     | 0.96          | 0.55 1.87                   |
| 5000-9999                             | 1.03              | 0.35             | 0.10     | 0.92          | 0.53 2.01                   |
| ≥10000                                | 1.11              | 0.45             | 0.27     | 0.79          | 0.50 2.47                   |
| <b>Health (ref: very good)</b>        |                   |                  |          |               |                             |
| Good                                  | 0.81              | 0.19             | -0.90    | 0.37          | 0.52 1.28                   |
| Medium or poor                        | 0.80              | 0.23             | -0.78    | 0.44          | 0.45 1.42                   |
| <b>_Cons</b>                          | 3.91              | 1.99             | 2.68     | 0.01          | 1.44 10.60                  |

Logistic regression

Number of observations = 1311  
 LR chi2(16)= 38.59  
 Prob > chi2 = 0.0012  
 Pseudo R2 = 0.0417

Log likelihood = -442.85598

Table S16. Multivariate logistic regression analysis on health threats of climate change health impact is serious or not in future in local community for clinical medicine students

| <b>Local0</b>                  | <b>Odds Ratio</b> | <b>Std. Err.</b> | <b>z</b> | <b>P&gt;z</b> | <b>[95% Conf. Interval]</b> |
|--------------------------------|-------------------|------------------|----------|---------------|-----------------------------|
| <b>Cause knowledge</b>         | 3.40              | 1.01             | 4.14     | 0.00          | 1.90 6.07                   |
| <b>Gender</b>                  | 0.69              | 0.19             | -1.34    | 0.18          | 0.40 1.19                   |
| <b>Age (ref: ≤20)</b>          |                   |                  |          |               |                             |
| 21-22                          | 1.51              | 0.76             | 0.82     | 0.41          | 0.57 4.03                   |
| >22                            | 1.75              | 1.01             | 0.96     | 0.34          | 0.56 5.44                   |
| <b>Area (ref: East)</b>        |                   |                  |          |               |                             |
| North                          | 1.44              | 0.63             | 0.83     | 0.41          | 0.61 3.40                   |
| Central                        | 2.10              | 1.11             | 1.40     | 0.16          | 0.74 5.94                   |
| West                           | 0.96              | 0.42             | -0.10    | 0.92          | 0.40 2.26                   |
| South                          | 0.93              | 0.41             | -0.17    | 0.86          | 0.39 2.19                   |
| <b>Income (ref: &lt; 1000)</b> |                   |                  |          |               |                             |
| 1000-1999                      | 0.48              | 0.25             | -1.38    | 0.17          | 0.17 1.36                   |
| 2000-4999                      | 0.67              | 0.33             | -0.80    | 0.42          | 0.25 1.78                   |
| 5000-9999                      | 1.18              | 0.68             | 0.30     | 0.77          | 0.39 3.63                   |
| ≥10000                         | 1.02              | 0.64             | 0.03     | 0.97          | 0.30 3.48                   |
| <b>Health (ref: very good)</b> |                   |                  |          |               |                             |
| Good                           | 1.14              | 0.36             | 0.41     | 0.68          | 0.61 2.12                   |
| Medium or poor                 | 1.92              | 0.89             | 1.41     | 0.16          | 0.77 4.76                   |
| <b>_Cons</b>                   | 3.89              | 3.03             | 1.74     | 0.08          | 0.84 17.94                  |

Logistic regression

Number of observations = 619  
 LR chi2(14) = 32.69  
 Prob > chi2 = 0.0032  
 Pseudo R2 = 0.0786

Log likelihood = -191.60666

Table S17. Multivariate logistic regression analysis on health threats of climate change health impact is serious or not in future in local community for preventive medicine students

| <b>Local0</b>                  | <b>Odds Ratio</b> | <b>Std. Err.</b> | <b>z</b> | <b>P&gt;z</b> | <b>[95% Conf. Interval]</b> |
|--------------------------------|-------------------|------------------|----------|---------------|-----------------------------|
| <b>Cause knowledge</b>         | 1.16              | 0.37             | 0.47     | 0.64          | 0.62 2.16                   |
| <b>Gender</b>                  | 0.71              | 0.24             | -1.01    | 0.32          | 0.37 1.38                   |
| <b>Age (ref: ≤20)</b>          |                   |                  |          |               |                             |
| 21-22                          | 1.71              | 1.07             | 0.86     | 0.39          | 0.50 5.81                   |
| >22                            | 1.33              | 0.95             | 0.40     | 0.69          | 0.33 5.38                   |
| <b>Area (ref: East)</b>        |                   |                  |          |               |                             |
| North                          | 1.81              | 1.09             | 0.98     | 0.33          | 0.56 5.90                   |
| Central                        | 0.61              | 0.31             | -0.98    | 0.33          | 0.22 1.64                   |
| West                           | 0.48              | 0.25             | -1.41    | 0.16          | 0.17 1.33                   |
| South                          | 1.28              | 0.69             | 0.46     | 0.64          | 0.45 3.70                   |
| <b>Income (ref: &lt; 1000)</b> |                   |                  |          |               |                             |
| 1000-1999                      | 2.01              | 1.13             | 1.24     | 0.21          | 0.67 6.05                   |
| 2000-4999                      | 1.55              | 0.78             | 0.87     | 0.39          | 0.58 4.17                   |
| 5000-9999                      | 1.49              | 0.83             | 0.72     | 0.47          | 0.50 4.44                   |
| ≥10000                         | 0.96              | 0.62             | -0.06    | 0.96          | 0.27 3.40                   |
| <b>Health (ref: very good)</b> |                   |                  |          |               |                             |
| Good                           | 0.50              | 0.24             | -1.45    | 0.15          | 0.20 1.28                   |
| Medium or poor                 | 0.37              | 0.20             | -1.82    | 0.07          | 0.12 1.08                   |
| <b>_Cons</b>                   | 6.42              | 6.11             | 1.95     | 0.05          | 0.99 41.44                  |

|                             |                        |   |        |
|-----------------------------|------------------------|---|--------|
| Logistic regression         | Number of observations | = | 398    |
|                             | LR chi2(14)            | = | 16.67  |
|                             | Prob > chi2            | = | 0.2743 |
| Log likelihood = -147.82545 | Pseudo R2              | = | 0.0534 |

Table S18. Multivariate logistic regression analysis on health threats of climate change health impact is serious or not in future in local community for nursing students

| <b>Local0</b>                  | <b>Odds Ratio</b> | <b>Std. Err.</b> | <b>z</b> | <b>P&gt;z</b> | <b>[95% Conf. Interval]</b> |
|--------------------------------|-------------------|------------------|----------|---------------|-----------------------------|
| <b>Cause knowledge</b>         | 2.08              | 0.95             | 1.61     | 0.11          | 0.85 5.07                   |
| <b>Gender</b>                  | 1.00              | 0.70             | 0.00     | 1.00          | 0.25 3.96                   |
| <b>Age (ref: ≤20)</b>          |                   |                  |          |               |                             |
| 21-22                          | 2.40              | 1.25             | 1.68     | 0.09          | 0.87 6.64                   |
| >22                            | 2.93              | 2.74             | 1.15     | 0.25          | 0.47 18.36                  |
| <b>Area (ref: East)</b>        |                   |                  |          |               |                             |
| North                          | 2.06              | 1.51             | 0.99     | 0.32          | 0.49 8.66                   |
| Central                        | 2.91              | 2.57             | 1.21     | 0.23          | 0.51 16.46                  |
| West                           | 0.64              | 0.44             | -0.64    | 0.52          | 0.17 2.46                   |
| South                          | 0.72              | 0.53             | -0.45    | 0.65          | 0.17 3.04                   |
| <b>Income (ref: &lt; 1000)</b> |                   |                  |          |               |                             |
| 1000-1999                      | 0.57              | 0.42             | -0.76    | 0.45          | 0.14 2.41                   |
| 2000-4999                      | 1.11              | 0.83             | 0.13     | 0.89          | 0.25 4.83                   |
| 5000-9999                      | 0.36              | 0.28             | -1.33    | 0.18          | 0.08 1.63                   |
| ≥10000                         | 1.00              | (empty)          |          |               |                             |
| <b>Health (ref: very good)</b> |                   |                  |          |               |                             |
| Good                           | 0.66              | 0.37             | -0.75    | 0.45          | 0.22 1.97                   |
| Medium or poor                 | 0.40              | 0.28             | -1.32    | 0.19          | 0.10 1.57                   |
| <b>_Cons</b>                   | 7.14              | 7.97             | 1.76     | 0.08          | 0.80 63.67                  |

Logistic regression

Number of observations = 280  
 LR chi2(13) = 21.63  
 Prob > chi2 = 0.0614  
 Pseudo R2 = 0.1134

Log likelihood = -84.526992



**Independent variable: China0--Future threats in China**

Table S19. Multivariate logistic regression analysis on health threats of climate change health impact is serious or not in future in China for all medical students

| <b>China0</b>                         | <b>Odds Ratio</b> | <b>Std. Err.</b> | <b>z</b> | <b>P&gt;z</b> | <b>[95% Conf. Interval]</b> |
|---------------------------------------|-------------------|------------------|----------|---------------|-----------------------------|
| <b>Cause knowledge</b>                | 5.44              | 2.03             | 4.53     | 0.00          | 2.61 11.31                  |
| <b>Gender</b>                         | 0.57              | 0.19             | -1.72    | 0.09          | 0.30 1.08                   |
| <b>Age (ref: ≤20)</b>                 |                   |                  |          |               |                             |
| 21-22                                 | 1.34              | 0.59             | 0.66     | 0.51          | 0.57 3.16                   |
| >22                                   | 2.44              | 1.49             | 1.46     | 0.15          | 0.73 8.10                   |
| <b>Area (ref: East)</b>               |                   |                  |          |               |                             |
| North                                 | 1.73              | 0.91             | 1.04     | 0.30          | 0.62 4.85                   |
| Central                               | 1.11              | 0.55             | 0.20     | 0.84          | 0.42 2.93                   |
| West                                  | 1.01              | 0.48             | 0.03     | 0.98          | 0.40 2.59                   |
| South                                 | 0.97              | 0.46             | -0.07    | 0.94          | 0.38 2.43                   |
| <b>Major (ref: Clinical medicine)</b> |                   |                  |          |               |                             |
| Preventive medicine                   | 0.97              | 0.34             | -0.08    | 0.94          | 0.49 1.94                   |
| Nursing                               | 0.81              | 0.32             | -0.54    | 0.59          | 0.38 1.74                   |
| <b>Income (ref: &lt;1000)</b>         |                   |                  |          |               |                             |
| 1000-1999                             | 1.51              | 0.69             | 0.91     | 0.37          | 0.62 3.69                   |
| 2000-4999                             | 1.96              | 0.83             | 1.59     | 0.11          | 0.85 4.51                   |
| 5000-9999                             | 1.85              | 0.87             | 1.30     | 0.19          | 0.73 4.67                   |
| ≥10000                                | 2.19              | 1.36             | 1.26     | 0.21          | 0.65 7.40                   |
| <b>Health (ref: very good)</b>        |                   |                  |          |               |                             |
| Good                                  | 1.26              | 0.42             | 0.69     | 0.49          | 0.66 2.41                   |
| Medium or poor                        | 1.68              | 0.81             | 1.08     | 0.28          | 0.66 4.30                   |
| <b>_Cons</b>                          | 5.31              | 4.04             | 2.19     | 0.03          | 1.19 23.63                  |

Logistic regression

Number of observations = 1311  
 LR chi2(16) = 39.97  
 Prob > chi2 = 0.0008  
 Pseudo R2 = 0.0888

Log likelihood = -205.12425

Table S20. Multivariate logistic regression analysis on health threats of climate change health impact is serious or not in future in China for clinical medicine students

| China0                         | Odds Ratio | Std. Err. | z     | P>z  | [95% Conf. | Interval] |
|--------------------------------|------------|-----------|-------|------|------------|-----------|
| <b>Cause knowledge</b>         | 9.25       | 5.86      | 3.51  | 0.00 | 2.67       | 32.00     |
| <b>Gender</b>                  | 0.83       | 0.37      | -0.41 | 0.68 | 0.35       | 1.98      |
| <b>Age (ref: ≤20)</b>          |            |           |       |      |            |           |
| 21-22                          | 0.50       | 0.54      | -0.65 | 0.52 | 0.06       | 4.08      |
| >22                            | 0.67       | 0.79      | -0.34 | 0.74 | 0.07       | 6.79      |
| <b>Area (ref: East)</b>        |            |           |       |      |            |           |
| North                          | 1.32       | 0.98      | 0.38  | 0.71 | 0.31       | 5.66      |
| Central                        | 1.28       | 1.07      | 0.29  | 0.77 | 0.25       | 6.59      |
| West                           | 0.70       | 0.50      | -0.50 | 0.62 | 0.17       | 2.82      |
| South                          | 0.73       | 0.53      | -0.44 | 0.66 | 0.18       | 3.00      |
| <b>Income (ref: &lt; 1000)</b> |            |           |       |      |            |           |
| 1000-1999                      | 0.83       | 0.59      | -0.26 | 0.80 | 0.21       | 3.31      |
| 2000-4999                      | 1.49       | 0.99      | 0.60  | 0.55 | 0.41       | 5.47      |
| 5000-9999                      | 1.73       | 1.31      | 0.73  | 0.47 | 0.39       | 7.63      |
| ≥10000                         | 1.66       | 1.53      | 0.55  | 0.58 | 0.28       | 10.05     |
| <b>Health (ref: very good)</b> |            |           |       |      |            |           |
| Good                           | 1.96       | 0.93      | 1.41  | 0.16 | 0.77       | 4.97      |
| Medium or poor                 | 2.90       | 2.05      | 1.51  | 0.13 | 0.73       | 11.56     |
| <b>_Cons</b>                   | 11.95      | 16.13     | 1.84  | 0.07 | 0.85       | 168.55    |

Logistic regression

Number of observations = 619  
 LR chi2(14)= 25.95  
 Prob > chi2 = 0.0263  
 Pseudo R2 = 0.1278

Log likelihood = -88.555634

Table S21. Multivariate logistic regression analysis on health threats of climate change health impact is serious or not in future in China for preventive medicine students

| <b>China0</b>                  | <b>Odds Ratio</b> | <b>Std. Err.</b> | <b>z</b> | <b>P&gt;z</b> | <b>[95% Conf. Interval]</b> |
|--------------------------------|-------------------|------------------|----------|---------------|-----------------------------|
| <b>Cause knowledge</b>         | 2.85              | 1.77             | 1.69     | 0.09          | 0.84 9.61                   |
| <b>Gender</b>                  | 0.51              | 0.30             | -1.16    | 0.25          | 0.16 1.59                   |
| <b>Age (ref: ≤20)</b>          |                   |                  |          |               |                             |
| 21-22                          | 1.13              | 1.27             | 0.11     | 0.92          | 0.12 10.28                  |
| >22                            | 4.60              | 7.10             | 0.99     | 0.32          | 0.22 95.01                  |
| <b>Area (ref: East)</b>        |                   |                  |          |               |                             |
| North                          | 1.08              | 1.15             | 0.08     | 0.94          | 0.13 8.71                   |
| Central                        | 0.51              | 0.49             | -0.70    | 0.49          | 0.08 3.41                   |
| West                           | 0.60              | 0.61             | -0.50    | 0.61          | 0.08 4.32                   |
| South                          | 1.60              | 1.73             | 0.43     | 0.67          | 0.19 13.35                  |
| <b>Income (ref: &lt; 1000)</b> |                   |                  |          |               |                             |
| 1000-1999                      | 2.36              | 2.12             | 0.95     | 0.34          | 0.40 13.74                  |
| 2000-4999                      | 3.40              | 2.99             | 1.39     | 0.17          | 0.60 19.12                  |
| 5000-9999                      | 3.99              | 4.04             | 1.37     | 0.17          | 0.55 28.99                  |
| ≥10000                         | 2.58              | 2.74             | 0.89     | 0.37          | 0.32 20.73                  |
| <b>Health (ref: very good)</b> |                   |                  |          |               |                             |
| Good                           | 1.28              | 0.85             | 0.37     | 0.71          | 0.35 4.69                   |
| Medium or poor                 | 1.20              | 1.00             | 0.22     | 0.83          | 0.23 6.19                   |
| <b>_Cons</b>                   | 6.29              | 9.77             | 1.19     | 0.24          | 0.30 131.77                 |

Logistic regression

Number of observations = 398

LR chi2(14) = 12.58

Prob > chi2 = 0.5599

Log likelihood = -57.600281

Pseudo R2 = 0.0984

Table S22. Multivariate logistic regression analysis on health threats of climate change health impact is serious or not in future in China for nursing students

| <b>China0</b>                  | <b>Odds Ratio</b> | <b>Std. Err.</b> | <b>z</b> | <b>P&gt;z</b> | <b>[95% Conf.</b> | <b>Interval]</b> |
|--------------------------------|-------------------|------------------|----------|---------------|-------------------|------------------|
| <b>Cause knowledge</b>         | 5.50              | 4.49             | 2.09     | 0.04          | 1.11              | 27.23            |
| <b>Gender</b>                  | 0.25              | 0.20             | -1.70    | 0.09          | 0.05              | 1.23             |
| <b>Age (ref: ≤20)</b>          |                   |                  |          |               |                   |                  |
| 21-22                          | 1.73              | 1.28             | 0.74     | 0.46          | 0.40              | 7.39             |
| >22                            | 4.40              | 6.19             | 1.05     | 0.29          | 0.28              | 69.21            |
| <b>Area (ref: East)</b>        |                   |                  |          |               |                   |                  |
| North                          | 4.33              | 5.27             | 1.20     | 0.23          | 0.40              | 46.98            |
| Central                        | 1.27              | 1.26             | 0.24     | 0.81          | 0.18              | 8.84             |
| West                           | 2.44              | 2.60             | 0.84     | 0.40          | 0.30              | 19.76            |
| South                          | 0.62              | 0.60             | -0.49    | 0.62          | 0.09              | 4.12             |
| <b>Income (ref: &lt;1000)</b>  |                   |                  |          |               |                   |                  |
| 1000-1999                      | 2.74              | 2.71             | 1.02     | 0.31          | 0.40              | 19.04            |
| 2000-4999                      | 1.58              | 1.34             | 0.54     | 0.59          | 0.30              | 8.31             |
| 5000-9999                      | 1.08              | 0.99             | 0.09     | 0.93          | 0.18              | 6.54             |
| ≥10000                         | 1.00              | (empty)          |          |               |                   |                  |
| <b>Health (ref: very good)</b> |                   |                  |          |               |                   |                  |
| Good                           | 0.37              | 0.31             | -1.20    | 0.23          | 0.07              | 1.88             |
| Medium or poor                 | 1.26              | 1.69             | 0.17     | 0.86          | 0.09              | 17.36            |
| <b>_Cons</b>                   | 9.35              | 14.23            | 1.47     | 0.14          | 0.47              | 184.65           |

|                             |                        |   |        |
|-----------------------------|------------------------|---|--------|
| Logistic regression         | Number of observations | = | 280    |
|                             | LR chi2(13)            | = | 19.71  |
|                             | Prob > chi2            | = | 0.1026 |
| Log likelihood = -48.635918 | Pseudo R2              | = | 0.1685 |

**Independent variable: World0--Future threats in world**

Table S23. Multivariate logistic regression analysis on health threats of climate change health impact is serious or not in future around the world for all medical students

| <b>World0</b>                         | <b>Odds Ratio</b> | <b>Std. Err.</b> | <b>z</b> | <b>P&gt;z</b> | <b>[95% Conf. Interval]</b> |
|---------------------------------------|-------------------|------------------|----------|---------------|-----------------------------|
| <b>Cause knowledge</b>                | 4.01              | 1.25             | 4.44     | 0.00          | 2.17 7.40                   |
| <b>Gender</b>                         | 0.59              | 0.17             | -1.82    | 0.07          | 0.33 1.04                   |
| <b>Age (ref: ≤20)</b>                 |                   |                  |          |               |                             |
| 21-22                                 | 1.45              | 0.60             | 0.91     | 0.37          | 0.65 3.27                   |
| >22                                   | 2.48              | 1.39             | 1.62     | 0.10          | 0.83 7.45                   |
| <b>Area (ref: East)</b>               |                   |                  |          |               |                             |
| North                                 | 1.23              | 0.56             | 0.45     | 0.65          | 0.50 3.02                   |
| Central                               | 1.14              | 0.54             | 0.28     | 0.78          | 0.45 2.89                   |
| West                                  | 1.01              | 0.45             | 0.02     | 0.98          | 0.42 2.44                   |
| South                                 | 0.95              | 0.42             | -0.10    | 0.92          | 0.40 2.28                   |
| <b>Major (ref: Clinical medicine)</b> |                   |                  |          |               |                             |
| Preventive medicine                   | 1.00              | 0.31             | 0.00     | 1.00          | 0.54 1.84                   |
| Nursing                               | 1.19              | 0.45             | 0.47     | 0.64          | 0.57 2.51                   |
| <b>Income (ref: &lt; 1000)</b>        |                   |                  |          |               |                             |
| 1000-1999                             | 1.49              | 0.68             | 0.88     | 0.38          | 0.61 3.64                   |
| 2000-4999                             | 1.59              | 0.66             | 1.13     | 0.26          | 0.71 3.57                   |
| 5000-9999                             | 1.53              | 0.69             | 0.93     | 0.35          | 0.63 3.71                   |
| ≥10000                                | 0.95              | 0.47             | -0.10    | 0.92          | 0.36 2.51                   |
| <b>Health (ref: very good)</b>        |                   |                  |          |               |                             |
| Good                                  | 1.73              | 0.52             | 1.85     | 0.07          | 0.97 3.11                   |
| Medium or poor                        | 1.63              | 0.66             | 1.20     | 0.23          | 0.73 3.62                   |
| <b>_Cons</b>                          | 4.23              | 2.99             | 2.05     | 0.04          | 1.06 16.86                  |

Logistic regression

Number of observations = 1311  
 LR chi2(16) = 37.74  
 Prob > chi2 = 0.0017  
 Pseudo R2 = 0.0738

Log likelihood = -236.80214

Table S24. Multivariate logistic regression analysis on health threats of climate change health impact is serious or not in future around the world for clinical medicine students

| <b>World0</b>                  | <b>Odds Ratio</b> | <b>Std. Err.</b> | <b>z</b> | <b>P&gt;z</b> | <b>[95% Conf.</b> | <b>Interval]</b> |
|--------------------------------|-------------------|------------------|----------|---------------|-------------------|------------------|
| <b>Cause knowledge</b>         | 6.36              | 3.03             | 3.88     | 0.00          | 2.50              | 16.18            |
| <b>Gender</b>                  | 0.59              | 0.24             | -1.31    | 0.19          | 0.27              | 1.29             |
| <b>Age (ref: ≤20)</b>          |                   |                  |          |               |                   |                  |
| 21-22                          | 1.22              | 0.84             | 0.29     | 0.78          | 0.31              | 4.73             |
| >22                            | 2.10              | 1.75             | 0.89     | 0.37          | 0.41              | 10.72            |
| <b>Area (ref: East)</b>        |                   |                  |          |               |                   |                  |
| North                          | 1.07              | 0.67             | 0.11     | 0.91          | 0.31              | 3.65             |
| Central                        | 2.16              | 1.72             | 0.97     | 0.33          | 0.45              | 10.29            |
| West                           | 0.72              | 0.45             | -0.53    | 0.60          | 0.21              | 2.44             |
| South                          | 0.96              | 0.64             | -0.06    | 0.95          | 0.26              | 3.53             |
| <b>Income (ref: &lt;1000)</b>  |                   |                  |          |               |                   |                  |
| 1000-1999                      | 1.35              | 1.03             | 0.39     | 0.69          | 0.30              | 6.01             |
| 2000-4999                      | 0.86              | 0.54             | -0.25    | 0.81          | 0.25              | 2.95             |
| 5000-9999                      | 1.31              | 0.95             | 0.37     | 0.71          | 0.31              | 5.46             |
| ≥10000                         | 0.58              | 0.42             | -0.75    | 0.46          | 0.14              | 2.39             |
| <b>Health (ref: very good)</b> |                   |                  |          |               |                   |                  |
| Good                           | 2.18              | 0.88             | 1.94     | 0.05          | 0.99              | 4.81             |
| Medium or poor                 | 5.88              | 4.63             | 2.25     | 0.03          | 1.26              | 27.50            |
| <b>_Cons</b>                   | 5.00              | 5.21             | 1.54     | 0.12          | 0.65              | 38.50            |

Logistic regression

Number of observations = 619  
 LR chi2(14)= 34.48  
 Prob > chi2 = 0.0018  
 Pseudo R2 = 0.1369

Log likelihood = -108.71587

Table S25. Multivariate logistic regression analysis on health threats of climate change health impact is serious or not in future around the world for preventive medicine students

| <b>World0</b>                  | <b>Odds Ratio</b> | <b>Std. Err.</b> | <b>z</b> | <b>P&gt;z</b> | <b>[95% Conf. Interval]</b> |
|--------------------------------|-------------------|------------------|----------|---------------|-----------------------------|
| <b>Cause knowledge</b>         | 1.98              | 1.06             | 1.27     | 0.21          | 0.69 5.68                   |
| <b>Gender</b>                  | 0.56              | 0.30             | -1.09    | 0.28          | 0.20 1.58                   |
| <b>Age (ref: ≤20)</b>          |                   |                  |          |               |                             |
| 21-22                          | 0.80              | 0.89             | -0.20    | 0.84          | 0.09 7.21                   |
| >22                            | 5.33              | 8.18             | 1.09     | 0.28          | 0.26 107.93                 |
| <b>Area (ref: East)</b>        |                   |                  |          |               |                             |
| North                          | 1.40              | 1.24             | 0.38     | 0.71          | 0.25 7.99                   |
| Central                        | 1.04              | 0.85             | 0.05     | 0.96          | 0.21 5.18                   |
| West                           | 1.79              | 1.67             | 0.62     | 0.53          | 0.29 11.11                  |
| South                          | 1.58              | 1.33             | 0.54     | 0.59          | 0.30 8.20                   |
| <b>Income (ref: &lt; 1000)</b> |                   |                  |          |               |                             |
| 1000-1999                      | 1.10              | 0.88             | 0.12     | 0.90          | 0.23 5.24                   |
| 2000-4999                      | 5.69              | 5.61             | 1.76     | 0.08          | 0.82 39.28                  |
| 5000-9999                      | 1.60              | 1.35             | 0.56     | 0.58          | 0.31 8.33                   |
| ≥10000                         | 1.06              | 0.99             | 0.06     | 0.95          | 0.17 6.61                   |
| <b>Health (ref: very good)</b> |                   |                  |          |               |                             |
| Good                           | 1.29              | 0.85             | 0.38     | 0.70          | 0.35 4.67                   |
| Medium or poor                 | 0.46              | 0.32             | -1.11    | 0.27          | 0.12 1.83                   |
| <b>_Cons</b>                   | 8.58              | 12.82            | 1.44     | 0.15          | 0.46 160.38                 |

Logistic regression

Number of observations = 398  
 LR chi2(14) = 19.92  
 Prob > chi2 = 0.1327  
 Pseudo R2 = 0.1305

Log likelihood = -66.376882

Table S26. Multivariate logistic regression analysis on health threats of climate change health impact is serious or not in future around the world for nursing students

| <b>World0</b>                  | <b>Odds Ratio</b> | <b>Std. Err.</b> | <b>z</b> | <b>P&gt;z</b> | <b>[95% Conf.</b> | <b>Interval]</b> |
|--------------------------------|-------------------|------------------|----------|---------------|-------------------|------------------|
| <b>Cause knowledge</b>         | 4.23              | 3.43             | 1.77     | 0.08          | 0.86              | 20.77            |
| <b>Gender</b>                  | 0.58              | 0.52             | -0.60    | 0.55          | 0.10              | 3.39             |
| <b>Age (ref: ≤20)</b>          |                   |                  |          |               |                   |                  |
| 21-22                          | 1.25              | 1.01             | 0.27     | 0.79          | 0.26              | 6.09             |
| >22                            | 0.55              | 0.67             | -0.49    | 0.63          | 0.05              | 6.11             |
| <b>Area (ref: East)</b>        |                   |                  |          |               |                   |                  |
| North                          | 1.86              | 2.43             | 0.48     | 0.63          | 0.14              | 24.08            |
| Central                        | 0.76              | 0.83             | -0.25    | 0.81          | 0.09              | 6.47             |
| West                           | 0.80              | 0.94             | -0.19    | 0.85          | 0.08              | 7.99             |
| South                          | 0.24              | 0.28             | -1.23    | 0.22          | 0.02              | 2.36             |
| <b>Income (ref: &lt;1000)</b>  |                   |                  |          |               |                   |                  |
| 1000-1999                      | 5.36              | 6.44             | 1.40     | 0.16          | 0.51              | 56.51            |
| 2000-4999                      | 1.26              | 1.06             | 0.27     | 0.79          | 0.24              | 6.60             |
| 5000-9999                      | 1.17              | 1.12             | 0.16     | 0.87          | 0.18              | 7.65             |
| ≥10000                         | 1.00              | (empty)          |          |               |                   |                  |
| <b>Health (ref: very good)</b> |                   |                  |          |               |                   |                  |
| Good                           | 1.07              | 0.79             | 0.09     | 0.93          | 0.25              | 4.57             |
| Medium or poor                 | 2.18              | 2.70             | 0.63     | 0.53          | 0.19              | 24.51            |
| <b>_Cons</b>                   | 13.48             | 21.75            | 1.61     | 0.11          | 0.57              | 318.27           |

Logistic regression

Number of observations = 280  
 LR chi2(13) = 14.41  
 Prob > chi2 = 0.3453  
 Pseudo R2 = 0.1370

Log likelihood = -45.394183



**Independent variable: Gtclihealth--Identification health impacts of climate change**

Table S27. Multivariate logistic regression analysis on identification of climate change health impact is high or not for all medical students

| <b>Gtclihealth</b>                    | <b>Odds Ratio</b> | <b>Std. Err.</b> | <b>z</b> | <b>P&gt;z</b> | <b>[95% Conf. Interval]</b> |
|---------------------------------------|-------------------|------------------|----------|---------------|-----------------------------|
| <b>Cause knowledge</b>                | 1.31              | 0.15             | 2.29     | 0.02          | 1.04 1.64                   |
| <b>Gender</b>                         | 0.84              | 0.11             | -1.34    | 0.18          | 0.65 1.09                   |
| <b>Age (ref: ≤20)</b>                 |                   |                  |          |               |                             |
| 21-22                                 | 1.27              | 0.27             | 1.14     | 0.25          | 0.84 1.91                   |
| >22                                   | 1.22              | 0.30             | 0.79     | 0.43          | 0.75 1.98                   |
| <b>Area (ref: East)</b>               |                   |                  |          |               |                             |
| North                                 | 1.34              | 0.25             | 1.59     | 0.11          | 0.93 1.94                   |
| Central                               | 1.18              | 0.23             | 0.85     | 0.39          | 0.80 1.74                   |
| West                                  | 0.91              | 0.18             | -0.49    | 0.62          | 0.62 1.33                   |
| South                                 | 1.24              | 0.24             | 1.09     | 0.28          | 0.84 1.81                   |
| <b>Major (ref: Clinical medicine)</b> |                   |                  |          |               |                             |
| Preventive medicine                   | 0.72              | 0.10             | -2.35    | 0.02          | 0.55 0.95                   |
| Nursing                               | 0.66              | 0.11             | -2.55    | 0.01          | 0.48 0.91                   |
| <b>Income (ref: &lt; 1000)</b>        |                   |                  |          |               |                             |
| 1000-1999                             | 0.79              | 0.17             | -1.09    | 0.28          | 0.52 1.21                   |
| 2000-4999                             | 1.05              | 0.21             | 0.25     | 0.80          | 0.71 1.56                   |
| 5000-9999                             | 1.07              | 0.23             | 0.31     | 0.76          | 0.70 1.63                   |
| ≥10000                                | 1.41              | 0.37             | 1.30     | 0.19          | 0.84 2.37                   |
| <b>Health (ref: very good)</b>        |                   |                  |          |               |                             |
| Good                                  | 0.66              | 0.10             | -2.76    | 0.01          | 0.49 0.89                   |
| Medium or poor                        | 0.54              | 0.10             | -3.25    | 0.00          | 0.37 0.78                   |
| <b>_Cons</b>                          | 1.50              | 0.53             | 1.16     | 0.25          | 0.76 3.00                   |

|                             |                        |   |        |
|-----------------------------|------------------------|---|--------|
| Logistic regression         | Number of observations | = | 1268   |
|                             | LR chi2(16)            | = | 44.32  |
|                             | Prob > chi2            | = | 0.0002 |
| Log likelihood = -845.31829 | Pseudo R2              | = | 0.0255 |

Table S28. Multivariate logistic regression analysis on identification of climate change health impact is high or not for clinical medicine students

| <b>Gtclihealth</b>             | <b>Odds Ratio</b> | <b>Std. Err.</b> | <b>z</b> | <b>P&gt;z</b> | <b>[95% Conf.</b> | <b>Interval]</b> |
|--------------------------------|-------------------|------------------|----------|---------------|-------------------|------------------|
| <b>Cause knowledge</b>         | 1.46              | 0.25             | 2.16     | 0.03          | 1.04              | 2.05             |
| <b>Gender</b>                  | 0.81              | 0.14             | -1.18    | 0.24          | 0.57              | 1.15             |
| <b>Age (ref: ≤20)</b>          |                   |                  |          |               |                   |                  |
| 21-22                          | 1.28              | 0.46             | 0.67     | 0.50          | 0.63              | 2.60             |
| >22                            | 1.02              | 0.41             | 0.05     | 0.96          | 0.46              | 2.24             |
| <b>Area (ref: East)</b>        |                   |                  |          |               |                   |                  |
| North                          | 1.60              | 0.44             | 1.72     | 0.09          | 0.94              | 2.74             |
| Central                        | 1.46              | 0.45             | 1.22     | 0.22          | 0.79              | 2.69             |
| West                           | 0.88              | 0.25             | -0.44    | 0.66          | 0.50              | 1.55             |
| South                          | 1.31              | 0.38             | 0.91     | 0.36          | 0.74              | 2.31             |
| <b>Income (ref: &lt;1000)</b>  |                   |                  |          |               |                   |                  |
| 1000-1999                      | 0.74              | 0.26             | -0.88    | 0.38          | 0.37              | 1.46             |
| 2000-4999                      | 0.93              | 0.30             | -0.22    | 0.82          | 0.50              | 1.74             |
| 5000-9999                      | 0.88              | 0.30             | -0.36    | 0.72          | 0.45              | 1.72             |
| ≥10000                         | 1.24              | 0.47             | 0.55     | 0.58          | 0.58              | 2.62             |
| <b>Health (ref: very good)</b> |                   |                  |          |               |                   |                  |
| Good                           | 0.78              | 0.17             | -1.19    | 0.24          | 0.51              | 1.18             |
| Medium or poor                 | 0.87              | 0.24             | -0.52    | 0.61          | 0.50              | 1.49             |
| <b>_Cons</b>                   | 1.31              | 0.70             | 0.50     | 0.62          | 0.46              | 3.71             |

Logistic regression

Number of observations = 596  
 LR chi2(14)= 19.35  
 Prob > chi2 = 0.1519  
 Pseudo R2 = 0.0244

Log likelihood = -386.84117

Table S29. Multivariate logistic regression analysis on identification of climate change health impact is high or not for preventive medicine students

| <b>Gtclihealth</b>             | <b>Odds Ratio</b> | <b>Std. Err.</b> | <b>z</b> | <b>P&gt;z</b> | <b>[95% Conf. Interval]</b> |
|--------------------------------|-------------------|------------------|----------|---------------|-----------------------------|
| <b>Cause knowledge</b>         | 1.27              | 0.28             | 1.10     | 0.27          | 0.83 1.95                   |
| <b>Gender</b>                  | 0.94              | 0.23             | -0.24    | 0.81          | 0.58 1.53                   |
| <b>Age (ref: ≤20)</b>          |                   |                  |          |               |                             |
| 21-22                          | 2.16              | 1.13             | 1.48     | 0.14          | 0.78 6.01                   |
| >22                            | 1.87              | 1.07             | 1.09     | 0.28          | 0.61 5.73                   |
| <b>Area (ref: East)</b>        |                   |                  |          |               |                             |
| North                          | 1.15              | 0.41             | 0.38     | 0.70          | 0.57 2.31                   |
| Central                        | 0.68              | 0.24             | -1.09    | 0.27          | 0.34 1.36                   |
| West                           | 0.69              | 0.26             | -1.00    | 0.32          | 0.33 1.43                   |
| South                          | 1.22              | 0.42             | 0.58     | 0.56          | 0.62 2.40                   |
| <b>Income (ref: &lt;1000)</b>  |                   |                  |          |               |                             |
| 1000-1999                      | 1.07              | 0.41             | 0.17     | 0.86          | 0.51 2.25                   |
| 2000-4999                      | 1.42              | 0.50             | 0.99     | 0.33          | 0.71 2.83                   |
| 5000-9999                      | 1.50              | 0.57             | 1.07     | 0.29          | 0.71 3.17                   |
| ≥10000                         | 2.32              | 1.15             | 1.70     | 0.09          | 0.88 6.12                   |
| <b>Health (ref: very good)</b> |                   |                  |          |               |                             |
| Good                           | 0.58              | 0.17             | -1.88    | 0.06          | 0.33 1.02                   |
| Medium or poor                 | 0.38              | 0.14             | -2.67    | 0.01          | 0.18 0.77                   |
| <b>_Cons</b>                   | 0.70              | 0.48             | -0.52    | 0.60          | 0.18 2.72                   |

Logistic regression

Number of observations = 385  
 LR chi2(14) = 21.49  
 Prob > chi2 = 0.0896  
 Pseudo R2 = 0.0404

Log likelihood = -255.16758

Table S30. Multivariate logistic regression analysis on identification of climate change health impact is high or not for nursing students

| <b>Gtclihealth</b>             | <b>Odds Ratio</b> | <b>Std. Err.</b> | <b>z</b> | <b>P&gt;z</b> | <b>[95% Conf. Interval]</b> |
|--------------------------------|-------------------|------------------|----------|---------------|-----------------------------|
| <b>Cause knowledge</b>         | 1.22              | 0.31             | 0.78     | 0.44          | 0.74 2.01                   |
| <b>Gender</b>                  | 1.05              | 0.42             | 0.12     | 0.91          | 0.47 2.32                   |
| <b>Age (ref: ≤20)</b>          |                   |                  |          |               |                             |
| 21-22                          | 0.73              | 0.26             | -0.90    | 0.37          | 0.36 1.45                   |
| >22                            | 1.47              | 0.76             | 0.74     | 0.46          | 0.53 4.06                   |
| <b>Area (ref: East)</b>        |                   |                  |          |               |                             |
| North                          | 1.24              | 0.48             | 0.56     | 0.58          | 0.58 2.66                   |
| Central                        | 1.67              | 0.70             | 1.22     | 0.22          | 0.73 3.78                   |
| West                           | 1.11              | 0.46             | 0.25     | 0.81          | 0.49 2.51                   |
| South                          | 0.77              | 0.36             | -0.56    | 0.57          | 0.31 1.92                   |
| <b>Income (ref: &lt; 1000)</b> |                   |                  |          |               |                             |
| 1000-1999                      | 0.72              | 0.31             | -0.76    | 0.45          | 0.31 1.68                   |
| 2000-4999                      | 0.84              | 0.35             | -0.43    | 0.67          | 0.37 1.89                   |
| 5000-9999                      | 0.86              | 0.40             | -0.32    | 0.75          | 0.34 2.15                   |
| ≥10000                         | 1.15              | 0.77             | 0.21     | 0.84          | 0.31 4.29                   |
| <b>Health (ref: very good)</b> |                   |                  |          |               |                             |
| Good                           | 0.59              | 0.19             | -1.66    | 0.10          | 0.31 1.10                   |
| Medium or poor                 | 0.35              | 0.16             | -2.37    | 0.02          | 0.15 0.84                   |
| <b>_Cons</b>                   | 1.94              | 1.31             | 0.98     | 0.33          | 0.52 7.31                   |

Logistic regression

Number of observations = 287  
 LR chi2(14) = 15.27  
 Prob > chi2 = 0.3600  
 Pseudo R2 = 0.0384

Log likelihood = -191.28258

**Table S31-S34: Sensitive analysis for codification methods**

**Cause knowledge:** Using the summed scores 0-4 for the knowledge of causes regarding climate change

Table S31. Multivariate logistic regression analysis on identification of climate change health impact is high or not for all medical students

| <b>Gtclihealth</b>             | <b>Odds Ratio</b> | <b>Std. Err.</b> | <b>z</b> | <b>P&gt;z</b> | <b>[95% Conf. Interval]</b> |
|--------------------------------|-------------------|------------------|----------|---------------|-----------------------------|
| <b>Cause knowledge</b>         | 1.20              | 0.07             | 3.13     | 0.00          | 1.07 1.34                   |
| <b>Gender</b>                  | 0.84              | 0.11             | -1.32    | 0.19          | 0.65 1.09                   |
| <b>Age (ref: ≤20)</b>          |                   |                  |          |               |                             |
| 21-22                          | 1.26              | 0.26             | 1.12     | 0.26          | 0.84 1.91                   |
| >22                            | 1.22              | 0.30             | 0.80     | 0.43          | 0.75 1.99                   |
| <b>Area (ref: East)</b>        |                   |                  |          |               |                             |
| North                          | 1.38              | 0.26             | 1.72     | 0.09          | 0.96 1.99                   |
| Central                        | 1.22              | 0.24             | 1.01     | 0.32          | 0.83 1.80                   |
| West                           | 0.93              | 0.18             | -0.36    | 0.72          | 0.63 1.37                   |
| South                          | 1.26              | 0.25             | 1.17     | 0.24          | 0.86 1.84                   |
| <b>Income (ref: &lt; 1000)</b> |                   |                  |          |               |                             |
| 1000-1999                      | 0.71              | 0.10             | -2.43    | 0.02          | 0.54 0.94                   |
| 2000-4999                      | 0.66              | 0.11             | -2.55    | 0.01          | 0.48 0.91                   |
| 5000-9999                      |                   |                  |          |               |                             |
| ≥10000                         | 0.78              | 0.17             | -1.16    | 0.25          | 0.51 1.19                   |
| <b>Health (ref: very good)</b> | 1.04              | 0.21             | 0.18     | 0.86          | 0.70 1.54                   |
| Good                           | 1.07              | 0.23             | 0.30     | 0.76          | 0.70 1.63                   |
| Medium or poor                 | 1.42              | 0.37             | 1.32     | 0.19          | 0.84 2.38                   |
| <b>_Cons</b>                   |                   |                  |          |               |                             |
| 2                              | 0.66              | 0.10             | -2.79    | 0.01          | 0.49 0.88                   |
| 3                              | 0.54              | 0.10             | -3.22    | 0.00          | 0.37 0.78                   |
| <b>_Cons</b>                   | 1.13              | 0.42             | 0.32     | 0.75          | 0.54 2.34                   |

Logistic regression

Number of observations = 1268  
 LR chi2(16) = 48.89  
 Prob > chi2 = 0.0000  
 Pseudo R2 = 0.0282

Log likelihood = -843.03472

Table S32. Multivariate logistic regression analysis on identification of climate change health impact is high or not for clinical medicine students

| <b>Gtclihealth</b>             | <b>Odds Ratio</b>      | <b>Std. Err.</b> | <b>z</b> | <b>P&gt;z</b> | <b>[95% Conf. Interval]</b> |
|--------------------------------|------------------------|------------------|----------|---------------|-----------------------------|
| <b>Cause knowledge</b>         | 1.25                   | 0.11             | 2.66     | 0.01          | 1.06 1.48                   |
| <b>Gender</b>                  | 0.81                   | 0.14             | -1.15    | 0.25          | 0.58 1.15                   |
| <b>Age (ref: ≤20)</b>          |                        |                  |          |               |                             |
| 21-22                          | 1.27                   | 0.46             | 0.66     | 0.51          | 0.62 2.60                   |
| >22                            | 1.03                   | 0.41             | 0.08     | 0.94          | 0.47 2.27                   |
| <b>Area (ref: East)</b>        |                        |                  |          |               |                             |
| North                          | 1.68                   | 0.46             | 1.88     | 0.06          | 0.98 2.87                   |
| Central                        | 1.57                   | 0.49             | 1.45     | 0.15          | 0.85 2.91                   |
| West                           | 0.92                   | 0.27             | -0.28    | 0.78          | 0.52 1.62                   |
| South                          | 1.34                   | 0.39             | 1.00     | 0.32          | 0.76 2.38                   |
| <b>Income (ref: &lt; 1000)</b> |                        |                  |          |               |                             |
| 1000-1999                      | 0.73                   | 0.25             | -0.90    | 0.37          | 0.37 1.45                   |
| 2000-4999                      | 0.92                   | 0.29             | -0.27    | 0.78          | 0.49 1.71                   |
| 5000-9999                      | 0.88                   | 0.30             | -0.37    | 0.71          | 0.45 1.72                   |
| ≥10000                         | 1.23                   | 0.47             | 0.55     | 0.58          | 0.58 2.62                   |
| <b>Health (ref: very good)</b> |                        |                  |          |               |                             |
| Good                           | 0.76                   | 0.16             | -1.25    | 0.21          | 0.50 1.16                   |
| Medium or poor                 | 0.86                   | 0.24             | -0.55    | 0.58          | 0.50 1.48                   |
| <b>_Cons</b>                   | 0.92                   | 0.52             | -0.15    | 0.88          | 0.31 2.76                   |
| Logistic regression            | Number of observations | =                | 596      |               |                             |
|                                | LR chi2(14)            | =                | 21.78    |               |                             |
|                                | Prob > chi2            | =                | 0.0833   |               |                             |
| Log likelihood = -385.62948    | Pseudo R2              | =                | 0.0275   |               |                             |



Table S34. Multivariate logistic regression analysis on identification of climate change health impact is high or not for nursing students

| <b>Gtclihealth</b>             | <b>Odds Ratio</b> | <b>Std. Err.</b> | <b>z</b> | <b>P&gt;z</b> | <b>[95% Conf. Interval]</b> |
|--------------------------------|-------------------|------------------|----------|---------------|-----------------------------|
| <b>Cause knowledge</b>         | 1.18              | 0.15             | 1.31     | 0.19          | 0.92 1.51                   |
| <b>Gender</b>                  | 1.02              | 0.41             | 0.06     | 0.95          | 0.46 2.27                   |
| <b>Age (ref: ≤20)</b>          |                   |                  |          |               |                             |
| 21-22                          | 0.72              | 0.25             | -0.94    | 0.35          | 0.36 1.43                   |
| >22                            | 1.46              | 0.76             | 0.72     | 0.47          | 0.53 4.03                   |
| <b>Area (ref: East)</b>        |                   |                  |          |               |                             |
| North                          | 1.27              | 0.50             | 0.61     | 0.54          | 0.59 2.74                   |
| Central                        | 1.68              | 0.70             | 1.23     | 0.22          | 0.74 3.81                   |
| West                           | 1.11              | 0.46             | 0.25     | 0.81          | 0.49 2.51                   |
| South                          | 0.77              | 0.36             | -0.56    | 0.58          | 0.31 1.93                   |
| <b>Income (ref: &lt; 1000)</b> |                   |                  |          |               |                             |
| 1000-1999                      | 0.71              | 0.31             | -0.79    | 0.43          | 0.31 1.66                   |
| 2000-4999                      | 0.83              | 0.34             | -0.46    | 0.65          | 0.37 1.87                   |
| 5000-9999                      | 0.86              | 0.40             | -0.34    | 0.74          | 0.34 2.14                   |
| ≥10000                         | 1.13              | 0.76             | 0.19     | 0.85          | 0.30 4.24                   |
| <b>Health (ref: very good)</b> |                   |                  |          |               |                             |
| Good                           | 0.59              | 0.19             | -1.63    | 0.10          | 0.32 1.11                   |
| Medium or poor                 | 0.34              | 0.15             | -2.42    | 0.02          | 0.14 0.82                   |
| <b>_Cons</b>                   | 1.49              | 1.08             | 0.56     | 0.58          | 0.36 6.13                   |

|                            |                        |   |        |
|----------------------------|------------------------|---|--------|
| Logistic regression        | Number of observations | = | 287    |
|                            | LR chi2(14)            | = | 16.40  |
|                            | Prob > chi2            | = | 0.2896 |
| Log likelihood = -190.7178 | Pseudo R2              | = | 0.0412 |

We also performed sensitivity tests by introducing the summed score (0-4) of causes knowledge into the regression models.

The sensitivity tests produced consistent results although the AORs changed.
